# Supplementary material
Source: HighWire-hosted journal article supplement (https://jnis.bmj.com/content/12/10/993)
Supplement: inline-supplementary-material-2 [file inline-supplementary-material-2.pdf]

**Supplemental Figure 2. Patient Questionnaire**

|                                                                                                                                                                                                                                                                                |                                                                                                            |
|--------------------------------------------------------------------------------------------------------------------------------------------------------------------------------------------------------------------------------------------------------------------------------|------------------------------------------------------------------------------------------------------------|
| <b>The following questions should be asked after sedation medications have worn off and at time of transradial tourniquet removal for wrist patients or at time lay flat time is complete for groin patients (in recovery room for outpatients, on floors for inpatients):</b> |                                                                                                            |
|                                                                                                                                                                                                                                                                                |                                                                                                            |
| If you have another angiogram, do you have no preference for the access site, do you prefer we gain access through the wrist or do you prefer we gain access through the groin?                                                                                                | <input type="checkbox"/> No preference<br><input type="checkbox"/> Wrist<br><input type="checkbox"/> Groin |
| Rate your back pain on a scale of 1-10 (after transradial tourniquet removed or end of lay flat time)                                                                                                                                                                          |                                                                                                            |
| Rate your level of embarrassment during the procedure on a scale of 1-10                                                                                                                                                                                                       |                                                                                                            |
| Rate your level of anxiety during the procedure on a scale of 1-10                                                                                                                                                                                                             |                                                                                                            |
| Rate your overall level of discomfort on a scale of 1-10                                                                                                                                                                                                                       |                                                                                                            |
| Rate your overall satisfaction on a scale of 1-10                                                                                                                                                                                                                              |                                                                                                            |
